# Supplementary material for: Dietary Supplementation of Tannic Acid Promotes Performance of Beef Cattle via Alleviating Liver Lipid Peroxidation and Improving Glucose Metabolism and Rumen Fermentation
Source: MDPI journal article supplement (doi:10.3390/antiox12091774), 2023-09-18
Supplement: s1 [file s1]

**Table S1** Composition and nutrient levels of the in vitro basal fermentation substrate (% DM basis).

| Ingredient composition     | Content |
|----------------------------|---------|
| Corn                       | 28.15   |
| Soybean meal               | 8.64    |
| Jujube powder              | 7.64    |
| Whole corn silage          | 32.96   |
| Corn stalk                 | 17.04   |
| Salt                       | 1.13    |
| Premix                     | 2.22    |
| Calcium hydrogen phosphate | 1.10    |
| Sodium bicarbonate         | 1.12    |
| Nutritional composition    |         |
| DM                         | 49.53   |
| CP                         | 12.24   |
| NDF                        | 42.51   |
| ADF                        | 22.25   |
| EE                         | 2.84    |
| Ca                         | 0.50    |
| P                          | 0.31    |

DM: dry matter; EE: ether extract; CP: crude protein; NDF: neutral detergent fiber; ADF: acid detergent fiber; Ca: calcium; P: phosphorus. Premix 1: Fe 12 g/kg, Mn 1 g/kg, Cu 1 g/kg, Zn 11 g/kg, I 30 mg/kg, Se 30 mg/kg, Co 20 mg/kg, Vitamin A 450,000 IU/kg, Vitamin D3 60,000 IU/kg, Vitamin E 2000 mg/kg.

**Table S2.** Sample sequencing information of in vivo experiment

| Sample | Sequence number | Base number | Mean length | Min length | Max length |
|--------|-----------------|-------------|-------------|------------|------------|
| CON-1  | 44,509          | 18,697,405  | 420         | 234        | 489        |
| CON-2  | 44,320          | 18,758,727  | 423         | 303        | 499        |
| CON-3  | 45,642          | 19,119,461  | 419         | 205        | 469        |
| CON-4  | 43,825          | 18,384,805  | 420         | 232        | 540        |
| CON-5  | 44,598          | 18,717,890  | 420         | 235        | 510        |
| TAN-1  | 41,652          | 17,522,899  | 421         | 234        | 523        |
| TAN-2  | 40,067          | 16,785,390  | 419         | 220        | 436        |
| TAN-3  | 45,653          | 19,142,599  | 419         | 252        | 487        |
| TAN-4  | 41,598          | 17,403,513  | 418         | 230        | 493        |
| TAN-5  | 46,036          | 19,084,614  | 415         | 232        | 492        |
| Mean   | 43,790          | 18,361,730  | 419         | 238        | 494        |
